# Supplementary material for: A resettable and reprogrammable biomolecular keypad lock with dual outputs based on glucose oxidase–Au nanoclusters–Prussian blue nanocomposite films on an electrode surface
Source: Royal Society of Chemistry journal article supplement (doi:10.1039/c6nr07344a), 2016-01-01
Supplement: c6nr07344a1.pdf [file c6nr07344a1.pdf]

## **Electronic Supplementary Information**

### **A resettable and reprogrammable biomolecular keypad lock with dual outputs based on glucose oxidase-Au nanoclusters-Prussian blue nanocomposite films on an electrode surface**

Xue Yu,<sup>a</sup> Menglu Li,<sup>a</sup> Tianrui Li,<sup>b</sup> Shuo Zhou<sup>b</sup> and Hongyun Liu<sup>\*a</sup>

<sup>a</sup> College of Chemistry, Beijing Normal University, Beijing 100875, People's Republic of China

<sup>b</sup> Beijing No.55 High School, Beijing 100027, People's Republic of China

\*Corresponding author: Hongyun Liu, 19, Xijiekouwai Street, Haidian District, Beijing 100875, People's Republic of China. Tel: (86)-10-58807843. E-mail: liuhongyun@bnu.edu.cn.

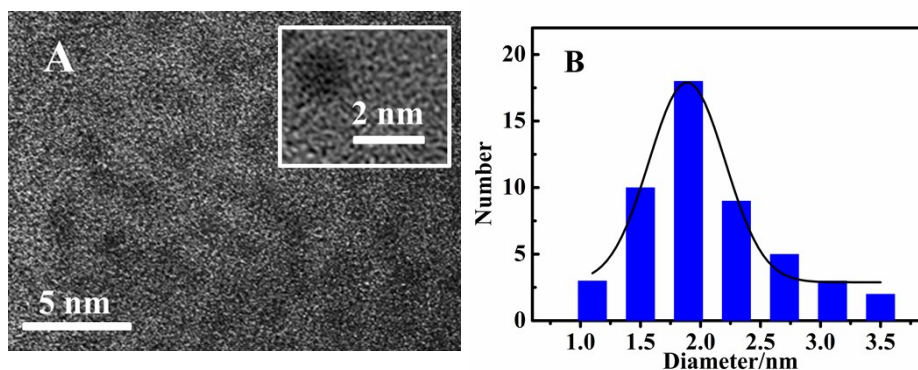

**Fig. S1** (A) TEM image of AuNCs. (B) Size distribution of AuNCs obtained from analysis of counting 50 particles in the TEM image.

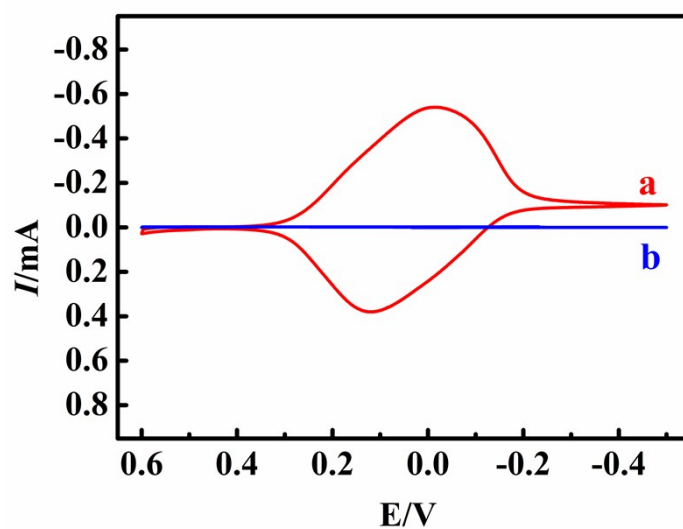

**Fig. S2** CVs at  $0.01 \text{ V s}^{-1}$  in pH 6.0 buffers for (a) PB films at ITO electrodes and (b) bare ITO electrodes.

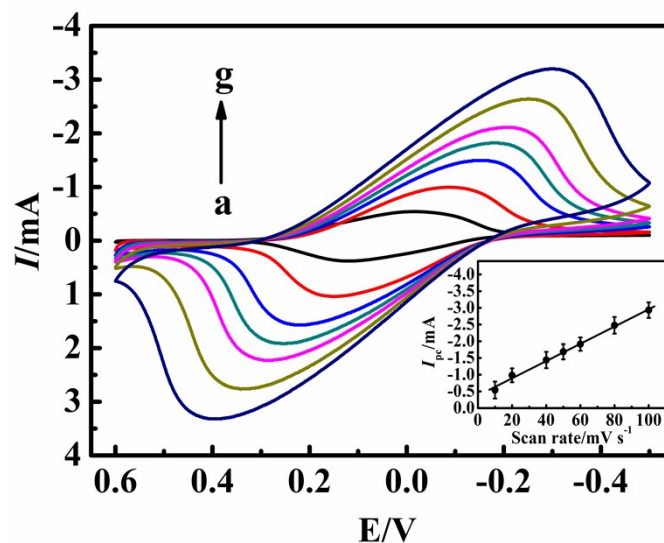

**Fig. S3** CVs at different scan rates (a – g: 10, 20, 40, 50, 60, 80, 100  $mV s^{-1}$ ) of the PB film electrode in pH 6.0 buffers. Inset: the relationship between the CV reduction peak current ( $I_{pc}$ ) and scan rates.

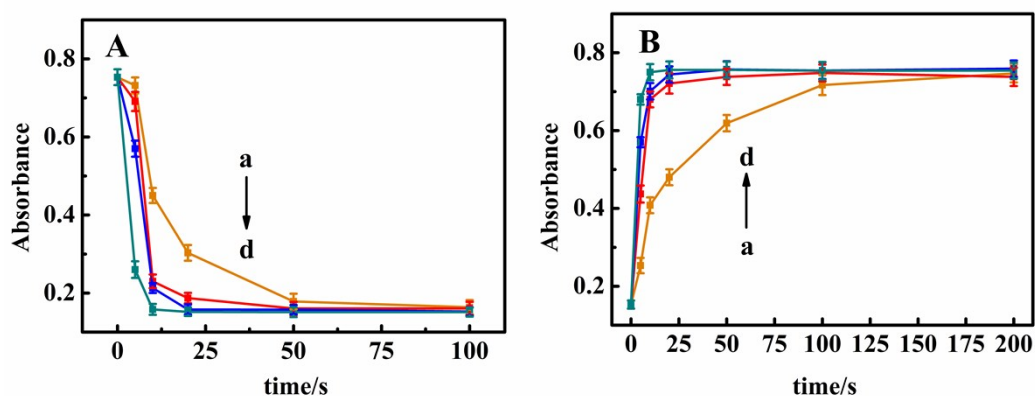

**Fig. S4** (A) Dependence of UV-vis absorbance for CS-AuNCs-GOD/PB films in pH 6.0 buffers on the time of applying potential at (a) 0, (b) -0.1, (c) -0.2 and (d) -0.3 V. (B) Dependence of UV-vis absorbance for CS-AuNCs-GOD/PW films in pH 6.0 buffers on the time of applying potential at (a) 0.2, (b) 0.3, (c) 0.4 and (d) 0.5 V.

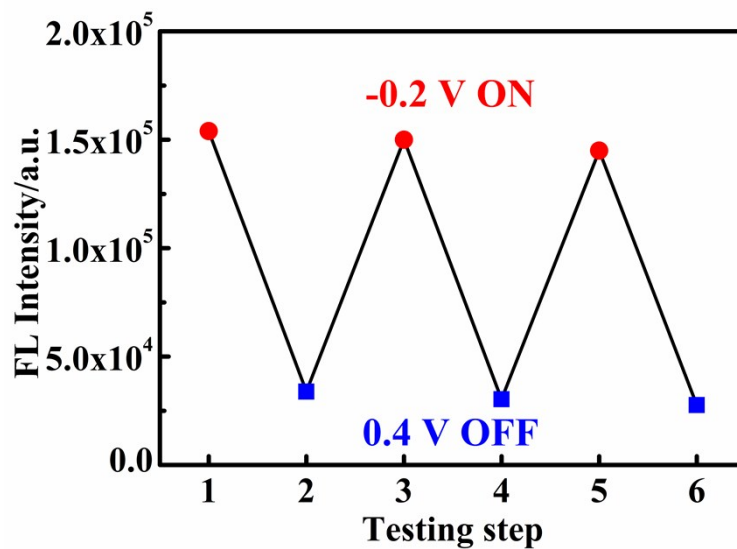

**Fig. S5** Variation of fluorescence emission intensity at 616 nm with applied potential switched between 0.4 and  $-0.2$  V for the nanocomposite film electrode in pH 6.0 buffers.

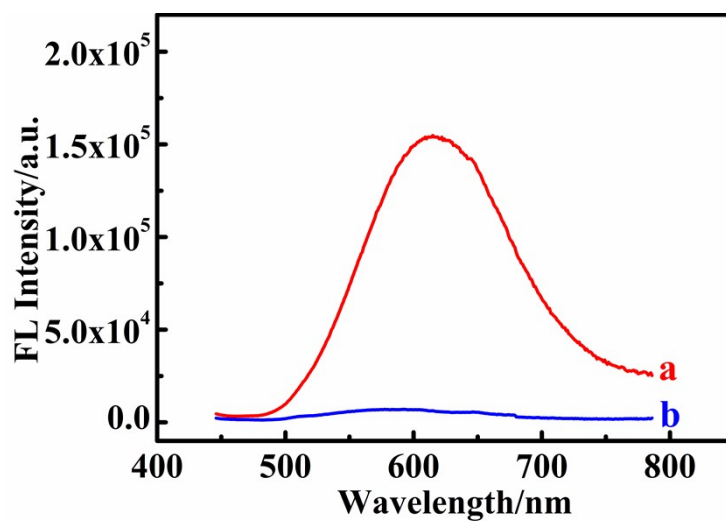

**Fig. S6** Fluorescence emission spectra of (a) CS-AuNCs-GOD/PW and (b) AuNCs-GOD/PW film electrodes after  $-0.2$  V was applied for 100 s in pH 6.0 buffers with excitation at 416 nm.

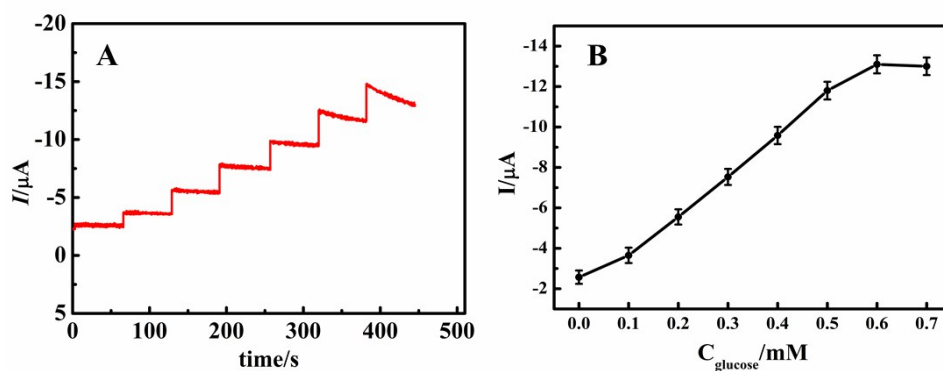

**Fig. S7** (A) Amperometric responses at CS-AuNCs-GOD/PW film electrodes after successive addition of 0.1 mM glucose into pH 6.0 buffer solutions equilibrated with air at constant potential of  $-0.2$  V. (B) The dependence of amperometric current at CS-AuNCs-GOD/PW film electrodes on the glucose concentration.

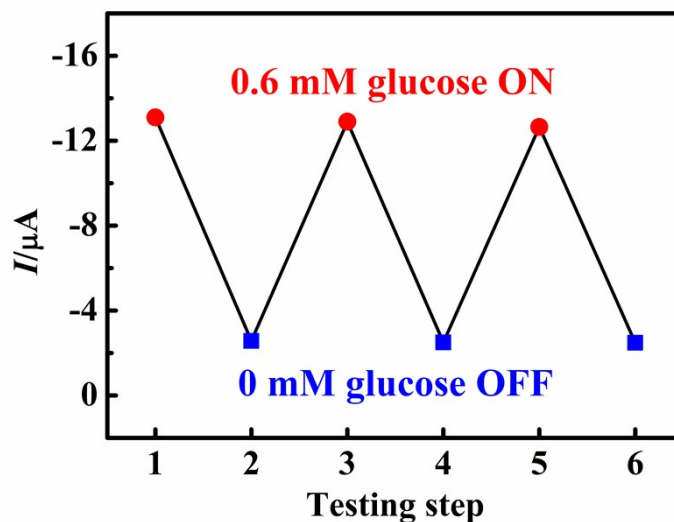

**Fig. S8** Variation of amperometric currents at CS-AuNCs-GOD/PW film electrodes in pH 6.0 buffers equilibrated with air at constant potential of  $-0.2$  V with switching the film electrode in solution between in the presence of 0.6 mM glucose and in the absence of glucose.

**Table S1** Truth table of the 2-input/3-output logic gate for the system

| Input A   | Input B | Output A | Output B              | Output C   |
|-----------|---------|----------|-----------------------|------------|
| potential | glucose | I        | FL Intensity (616 nm) | A (700 nm) |
| 1         | 1       | 1        | 0                     | 1          |
| 1         | 0       | 0        | 1                     | 0          |
| 0         | 1       | 0        | 0                     | 1          |
| 0         | 0       | 0        | 0                     | 1          |

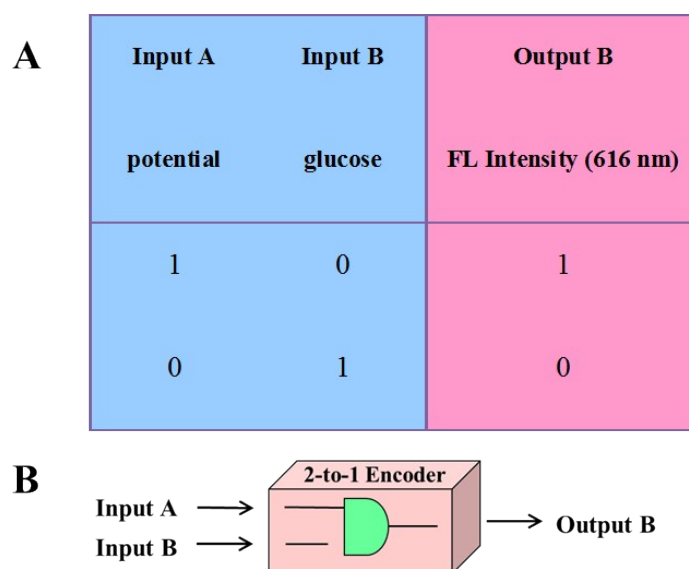

**Fig. S9** (A) Truth table and (B) the symbolic representation of the 2-to-1 encoder with potential as Input A and glucose as Input B, and the fluorescence peak at 616 nm as Output B.

**Table S2** The truth table for the keypad lock system

| Input sequence |   |   | Output B | Output C |
|----------------|---|---|----------|----------|
| U              | S | P | 0        | 0        |
| U              | P | S | 0        | 1        |
| P              | S | U | 0        | 1        |
| S              | U | P | 0        | 0        |
| S              | P | U | 1        | 0        |
| P              | U | S | 1        | 1        |

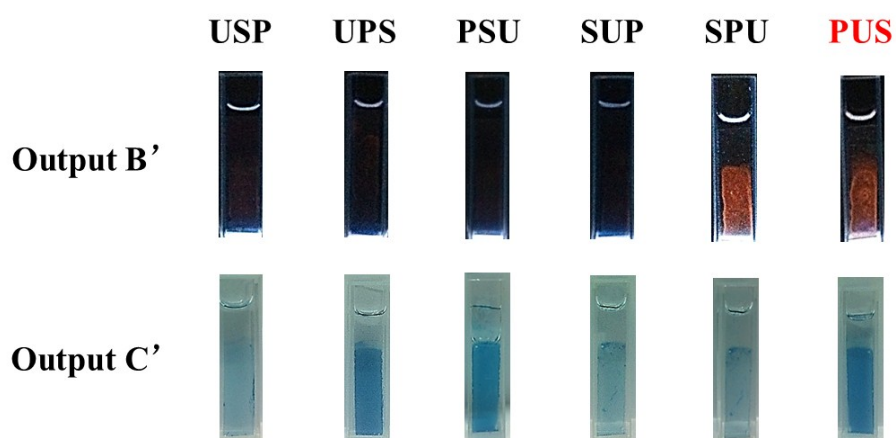

**Fig. S10** Photographs of the nanocomposite film electrodes with 6 possible sequences of the 3 inputs for the keypad lock system taken under irradiation of the UV light at 365 nm (Output B') and after all the 3 input operations were finished (Output C').
